# Supplementary material
Source: Springer Nature journal article supplement (https://www.springermedizin.de/resource/supplementary/12943_2012_1092_MOESM5_ESM.pdf/9552468)
Supplement: MOESM5 [file 9552468]

**Supplementary Figure S2:** 3'UTR sequences from *WEE1* cloned into the luciferase reporter constructs.

**WEE1 luciferase plasmid insert with wild-type miR-497 binding sites: (WT WEE1) (NM\_001143976)**

5'  
atTTTgatgattgctatgtcaggcTTTcatcctaattaccagtctgtcttctgtaggatgtgtcactgttggat  
gttacaccagcctttccagggttaaccactgtggTGGTGTGCTGCTTatagtttgctgttgcattgtaataaaaag  
gtgtctttccctgtagtgacctgtaaaaagtactcaagggctttattacagacataccctcccttgaaaaggga  
catgctaaaagactcattactactcagccttcaatgtacctgtgtgtccatcttataatttcttttttttttaatt  
gtgaattagacttgatatcccactgggagcactttgtaggcattgcatgaacctgggatgatgattctgtgga  
ggattgccttggaattTGTGCTatTTTtagtttTgtcttTgtctgtaaaactTgtagcattaaacaatcattgtt  
3'

**WEE1 luciferase plasmid insert with first miR-497 binding site mutated: (Mut1 WEE1)**

5'  
atTTTgatgattgctatgtcaggcTTTcatcctaattaccagtctgtcttctgtaggatgtgtcactgttggat  
gttacaccagcctttccagggttaaccactgtggTGGTGTGCTATTCtatagtttgctgttgcattgtaataaaaag  
gtgtctttccctgtagtgacctgtaaaaagtactcaagggctttattacagacataccctcccttgaaaaggga  
catgctaaaagactcattactactcagccttcaatgtacctgtgtgtccatcttataatttcttttttttttaatt  
gtgaattagacttgatatcccactgggagcactttgtaggcattgcatgaacctgggatgatgattctgtgga  
ggattgccttggaattTGTGCTatTTTtagtttTgtcttTgtctgtaaaactTgtagcattaaacaatcattgtt  
3'

**WEE1 luciferase plasmid insert with both miR-497 binding sites mutated: (Double Mut WEE1)**

5'  
atTTTgatgattgctatgtcaggcTTTcatcctaattaccagtctgtcttctgtaggatgtgtcactgttggat  
gttacaccagcctttccagggttaaccactgtggTGGTGTGCTATTCtatagtttgctgttgcattgtaataaaaag  
gtgtctttccctgtagtgacctgtaaaaagtactcaagggctttattacagacataccctcccttgaaaaggga  
catgctaaaagactcattactactcagccttcaatgtacctgtgtgtccatcttataatttcttttttttttaatt  
gtgaattagacttgatatcccactgggagcactttgtaggcattgcatgaacctgggatgatgattctgtgga  
ggattgccttggaattGAATATCattTTtagtttTgtcttTgtctgtaaaactTgtagcattaaacaatcattgtt  
3'

**WEE1 luciferase plasmid insert with second miR-497 binding site mutated: (Mut2 WEE1)**

5'  
atTTTgatgattgctatgtcaggcTTTcatcctaattaccagtctgtcttctgtaggatgtgtcactgttggat  
gttacaccagcctttccagggttaaccactgtggTGGTGTGCTGCTTatagtttgctgttgcattgtaataaaaag  
gtgtctttccctgtagtgacctgtaaaaagtactcaagggctttattacagacataccctcccttgaaaaggga  
catgctaaaagactcattactactcagccttcaatgtacctgtgtgtccatcttataatttcttttttttttaatt  
gtgaattagacttgatatcccactgggagcactttgtaggcattgcatgaacctgggatgatgattctgtgga  
ggattgccttggaattGAATATCattTTtagtttTgtcttTgtctgtaaaactTgtagcattaaacaatcattgtt  
3'
